# Supplementary material
Source: PubMed Central journal article supplement (PMC2875552)
Supplement: NIHMS164794-supplement-S-1.pdf [file NIHMS164794-supplement-S-1.pdf]

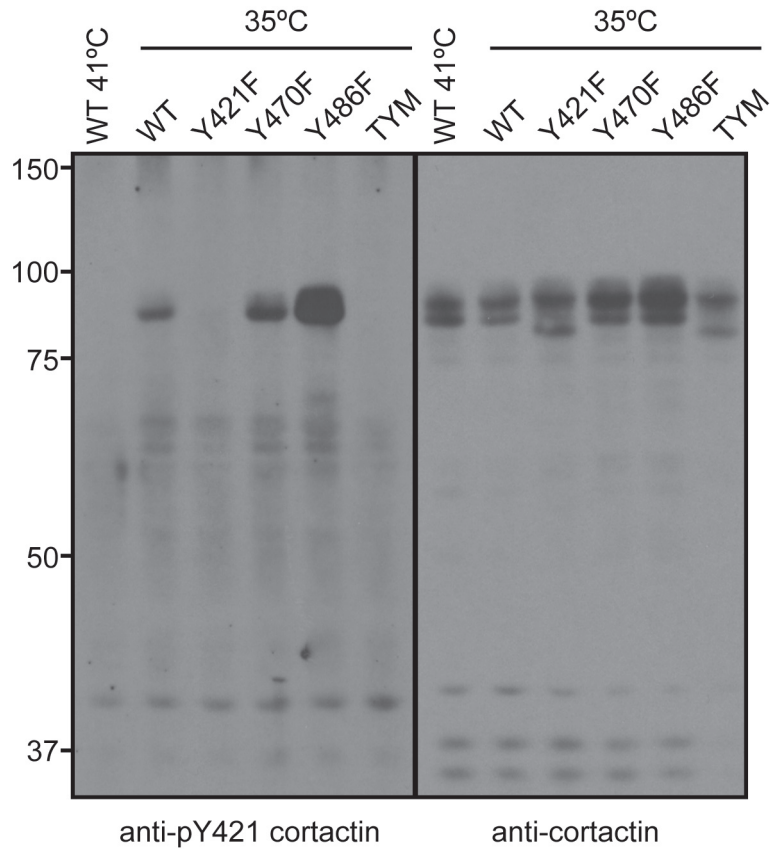

*Ammer et al. Supplementary Figure 1*

**Supplementary Figure 1:** Specificity of human anti-pY421 cortactin antibody. SYF fibroblasts lacking Src, Yes and Fyn were cotransfected with the temperature-sensitive Src allele La29 along with expression vectors encoding recombinant wild-type human cortactin (WT) or cortactin mutants containing tyrosine-phenylalanine substitutions at the indicated Src-targeted amino acids and held at the non-permissive temperature (41<sup>L</sup>) or switched to the activating permissive temperature (35<sup>L</sup>). TYM; triple tyrosine-phenylalanine cortactin mutant lacking all three Src-targeted sites. Cells were lysed and analyzed by Western blot analysis with anti-pY421 cortactin (*left*). The blot was stripped and reprobbed with anti-cortactin monoclonal antibody 4F11 (*right*). The position of molecular weight markers is noted on the *left* in kilodaltons.
